# Supplementary material for: Nationwide Trends in Bacterial Meningitis before the Introduction of 13-Valent Pneumococcal Conjugate Vaccine—Burkina Faso, 2011–2013
Source: PubMed Central journal article supplement (PMC5104358; doi:10.1371/journal.pone.0166384), 2016-11-10
Supplement: pone.0166384.s002.pdf [file pone.0166384.s002.pdf]

**S1 Table. Comparison of suspected meningitis cases tested<sup>a</sup> vs. not tested at a national reference lab, Burkina Faso, 2011–2013**

|                              | 2011           |                    | 2012           |                    | 2013           |                    | Total          |                    |
|------------------------------|----------------|--------------------|----------------|--------------------|----------------|--------------------|----------------|--------------------|
|                              | Tested<br>N(%) | Not tested<br>N(%) | Tested<br>N(%) | Not tested<br>N(%) | Tested<br>N(%) | Not tested<br>N(%) | Tested<br>N(%) | Not tested<br>N(%) |
| Suspect cases                | 1,242 (44)     | 1,599 (56)         | 2,379 (37)     | 4,120 (63)         | 1,836 (65)     | 993 (35)           | 5,457 (45)     | 6,712 (55)         |
| Age group <sup>b</sup> :     |                |                    |                |                    |                |                    |                |                    |
| <1 years                     | 240 (19)       | 351 (22)           | 408 (17)       | 811 (20)           | 384 (21)       | 190 (19)           | 1,032 (19)     | 1,352 (20)         |
| 1-4 years                    | 234 (19)       | 433 (27)           | 679 (29)       | 1,259 (31)         | 518 (28)       | 292 (30)           | 1,431 (26)     | 1,984 (30)         |
| 5-9 years                    | 237 (19)       | 267 (17)           | 515 (22)       | 808 (20)           | 357 (19)       | 159 (16)           | 1,109 (20)     | 1,234 (19)         |
| 10-14 years                  | 202 (16)       | 200 (13)           | 345 (15)       | 481 (12)           | 223 (12)       | 110 (11)           | 770 (14)       | 791 (12)           |
| ≥15 years                    | 326 (26)       | 338 (21)           | 424 (18)       | 739 (18)           | 351 (19)       | 230 (23)           | 1,101 (20)     | 1,307 (20)         |
| Gram stain:                  |                |                    |                |                    |                |                    |                |                    |
| Not done                     | 90 (7)         | 243 (15)           | 89 (4)         | 784 (19)           | 116 (6)        | 253 (25)           | 295 (5)        | 1,280 (19)         |
| Done                         | 1,152 (93)     | 1,356 (85)         | 2,290 (96)     | 3,336 (81)         | 1,720 (94)     | 740 (75)           | 5,162 (95)     | 5,432 (81)         |
| BGN                          | 20 (2)         | 33 (2)             | 26 (1)         | 52 (1)             | 21 (1)         | 10 (1)             | 67 (1)         | 95 (1)             |
| BGP                          | 1 (0.1)        | 9 (1)              | 6 (0.3)        | 20 (0.5)           | 4 (0.2)        | 9 (1)              | 11 (0.2)       | 38 (1)             |
| DGN                          | 89 (7)         | 108 (7)            | 553 (23)       | 838 (20)           | 183 (10)       | 65 (7)             | 825 (15)       | 1,011 (15)         |
| DGP                          | 378 (30)       | 264 (17)           | 315 (13)       | 363 (9)            | 296 (16)       | 128 (13)           | 989 (18)       | 755 (11)           |
| Negative                     | 664 (53)       | 942 (59)           | 1,390 (58)     | 2,063 (50)         | 1,216 (66)     | 528 (53)           | 3,270 (60)     | 3,533 (53)         |
| Probable case <sup>c</sup> : |                |                    |                |                    |                |                    |                |                    |
| Yes                          | 800 (64)       | 688 (43)           | 1,459 (61)     | 2,268 (55)         | 953 (52)       | 424 (43)           | 3,212 (59)     | 3,380 (50)         |
| No                           | 442 (36)       | 911 (57)           | 920 (39)       | 1,852 (45)         | 883 (48)       | 569 (57)           | 2,245 (41)     | 3,332 (50)         |
| Reported death               |                |                    |                |                    |                |                    |                |                    |
| Yes                          | 199 (16)       | 220 (14)           | 184 (7)        | 406 (10)           | 190 (10)       | 145 (15)           | 573 (11)       | 771 (11)           |
| No                           | 1,043 (84)     | 1,379 (86)         | 2,195 (92)     | 3,714 (90)         | 1,646 (90)     | 848 (85)           | 4,884 (90)     | 5,941 (89)         |

Abbreviations: BGN, gram negative bacilli; BGP, gram positive bacilli; CSF, cerebrospinal fluid; DGN, gram negative diplococci; DGP, gram positive diplococci.

<sup>a</sup> A suspected meningitis case was defined as being tested at a national reference lab if it was tested by culture and/or real-time polymerase chain reaction.

<sup>b</sup> 58 cases missing age

<sup>c</sup> Probable bacterial meningitis is a suspected case with turbid, cloudy, purulent, or xanthochromic CSF; or presence of DGN, DGP, or BGN on microscopic examination of CSF; or a CSF white cell count >10/mm<sup>3</sup>.
