# Supplementary material for: Nationwide Trends in Bacterial Meningitis before the Introduction of 13-Valent Pneumococcal Conjugate Vaccine—Burkina Faso, 2011–2013
Source: PubMed Central journal article supplement (PMC5104358; doi:10.1371/journal.pone.0166384), 2016-11-10
Supplement: pone.0166384.s003.pdf [file pone.0166384.s003.pdf]

**S2 Table. Bacterial meningitis epidemiology in infants aged <1 month and persons aged ≥65 years, Burkina Faso, 2011–2013**

|                                                    | <1 month<br>N (%) | ≥65 years<br>N (%) |
|----------------------------------------------------|-------------------|--------------------|
| Suspected meningitis cases                         | 15                | 149                |
| Reported deaths                                    | 1 (7)             | 36 (24)            |
| Probable bacterial meningitis cases                | 7 (47)            | 78 (52)            |
| Laboratory-confirmed meningitis cases <sup>a</sup> | 4 (27)            | 34 (23)            |
| <i>H. influenzae</i>                               | 0 (0)             | 0 (0)              |
| <i>N. meningitidis</i>                             | 1 (25)            | 5 (15)             |
| Reported deaths                                    | 0 (0)             | 0 (0)              |
| Meningococcal serogroup                            |                   |                    |
| W                                                  | 1 (100)           | 2 (67)             |
| X                                                  | 0 (0)             | 1 (33)             |
| Missing serogroup                                  | 0                 | 2                  |
| <i>S. pneumoniae</i>                               | 3 (75)            | 29 (85)            |
| Reported deaths                                    | 1 (33)            | 14 (48)            |
| Pneumococcal serotype                              |                   |                    |
| 1                                                  | 1 (100)           | 6 (30)             |
| 4                                                  | 0 (0)             | 1 (5)              |
| 7F/7A                                              | 0 (0)             | 2 (10)             |
| 12F/12A/12B/44/46                                  | 0 (0)             | 4 (20)             |
| 19A                                                | 0 (0)             | 1 (5)              |
| 23F                                                | 0 (0)             | 1 (5)              |
| Non-typeable                                       | 0 (0)             | 5 (25)             |
| Missing serotype                                   | 2                 | 9                  |

<sup>a</sup> A confirmed case of meningitis is a suspected or probable case with *S. pneumoniae*, *N. meningitidis*, or *H. influenzae* isolated from CSF by culture or detected in cerebrospinal fluid by real-time polymerase chain reaction or latex agglutination.
