# Supplementary material for: Nationwide Trends in Bacterial Meningitis before the Introduction of 13-Valent Pneumococcal Conjugate Vaccine—Burkina Faso, 2011–2013
Source: PubMed Central journal article supplement (PMC5104358; doi:10.1371/journal.pone.0166384), 2016-11-10
Supplement: pone.0166384.s004.pdf [file pone.0166384.s004.pdf]

**S3 Table. Re-calculated incidences in the subset of high-reporting districts<sup>a</sup> that provided case-based data for at least 65% of aggregately-reported cases each year**

|                                                      | 2011 | 2012 | 2013 | Average |
|------------------------------------------------------|------|------|------|---------|
| Suspected meningitis cases <sup>b</sup>              | 23.9 | 40.0 | 17.0 | 27.0    |
| Probable bacterial meningitis cases <sup>b</sup>     | 12.5 | 23.1 | 8.3  | 14.6    |
| Laboratory-confirmed meningitis cases <sup>c,d</sup> | 11.9 | 14.0 | 4.2  | 10.0    |
| <i>H. influenzae</i>                                 | 0.3  | 0.2  | 0.1  | 0.2     |
| Age group                                            |      |      |      |         |
| <5 years                                             | 1.1  | 0.7  | 0.4  | 0.7     |
| ≥5 years                                             | 0.2  | 0.1  | 0.0  | 0.1     |
| <i>N. meningitidis</i>                               | 2.8  | 8.7  | 1.6  | 4.4     |
| Age group                                            |      |      |      |         |
| <5 years                                             | 4.5  | 16.7 | 2.7  | 8.0     |
| ≥5 years                                             | 2.4  | 6.8  | 1.3  | 3.5     |
| <i>S. pneumoniae</i>                                 | 8.7  | 5.1  | 2.6  | 5.5     |
| Age group                                            |      |      |      |         |
| <1 years                                             | 42.3 | 24.0 | 12.1 | 26.1    |
| 1-4 years                                            | 9.4  | 5.1  | 2.4  | 5.6     |
| 5-9 years                                            | 11.6 | 7.1  | 3.1  | 7.2     |
| 10-14 years                                          | 11.2 | 6.7  | 3.6  | 7.2     |
| ≥15 years                                            | 4.4  | 2.6  | 1.4  | 2.8     |

<sup>a</sup> Of 63 districts, 39 were high-reporting in 2011, 59 in 2012, and 62 in 2013.

<sup>b</sup> Crude incidence

<sup>c</sup> A confirmed case of meningitis is a suspected or probable case with *S. pneumoniae*, *N. meningitidis*, or *H. influenzae* isolated from cerebrospinal fluid (CSF) by culture or detected in CSF by real-time polymerase chain reaction or latex.

<sup>d</sup> Incidence adjusted for the proportion of cases with CSF tested at a national laboratory.
