# Supplementary material for: Nationwide Trends in Bacterial Meningitis before the Introduction of 13-Valent Pneumococcal Conjugate Vaccine—Burkina Faso, 2011–2013
Source: PubMed Central journal article supplement (PMC5104358; doi:10.1371/journal.pone.0166384), 2016-11-10
Supplement: pone.0166384.s005.pdf [file pone.0166384.s005.pdf]

**S4 Table. Distribution of pneumococcal serotypes, Burkina Faso, 2011–2013**

| Pneumococcal serotype               | 2011<br>N (%)   | 2012<br>N (%)   | 2013<br>N (%)   | Total<br>N (%)    |
|-------------------------------------|-----------------|-----------------|-----------------|-------------------|
| <b><i>PCV13-associated</i></b>      | <b>291 (76)</b> | <b>234 (72)</b> | <b>212 (65)</b> | <b>737 (71)</b>   |
| 1                                   | 211 (55)        | 135 (41)        | 118 (36)        | 464 (45)          |
| 3                                   | 1 (0.3)         | 2 (1)           | 2 (1)           | 5 (0.5)           |
| 4                                   | 5 (1)           | 2 (1)           | 3 (1)           | 10 (1)            |
| 5                                   | 35 (9)          | 21 (6)          | 15 (5)          | 71 (7)            |
| 6A/6B                               | 8 (2)           | 19 (6)          | 19 (6)          | 46 (4)            |
| 7F/7A                               | 4 (1)           | 5 (2)           | 7 (2)           | 16 (2)            |
| 9V/9A                               | 0 (0)           | 2 (1)           | 1 (0.3)         | 3 (0.3)           |
| 14                                  | 16 (4)          | 7 (2)           | 11 (3)          | 34 (3)            |
| 18C/18F/18B/18A                     | 2 (1)           | 12 (4)          | 6 (2)           | 20 (2)            |
| 19A                                 | 1 (0.3)         | 5 (2)           | 3 (1)           | 9 (1)             |
| 19F                                 | 2 (1)           | 3 (1)           | 6 (2)           | 11 (1)            |
| 23F                                 | 6 (2)           | 21 (6)          | 21 (6)          | 48 (5)            |
| <b><i>Non-PCV13-associated</i></b>  | <b>30 (8)</b>   | <b>49 (15)</b>  | <b>62 (19)</b>  | <b>141 (14)</b>   |
| 2                                   | 3 (1)           | 8 (2)           | 6 (2)           | 17 (2)            |
| 7C/7B/40                            | 0 (0)           | 0 (0)           | 0 (0)           | 0 (0)             |
| 8                                   | 0 (0)           | 0 (0)           | 2 (1)           | 2 (0.2)           |
| 9N/9L                               | 0 (0)           | 2 (1)           | 2 (1)           | 4 (0.4)           |
| 10F/10C/33C                         | 0 (0)           | 0 (0)           | 1 (0.3)         | 1 (0.1)           |
| 11A/11D                             | 1 (0.3)         | 0 (0)           | 0 (0)           | 1 (0.1)           |
| 12F/12A/12B/44/46                   | 20 (5)          | 26 (8)          | 36 (11)         | 82 (8)            |
| 13                                  | 0 (0)           | 1 (0.3)         | 0 (0)           | 1 (0.1)           |
| 15B/15C                             | 3 (1)           | 0 (0)           | 2 (1)           | 5 (0.5)           |
| 16F                                 | 0 (0)           | 2 (1)           | 2 (1)           | 4 (0.4)           |
| 21                                  | 1 (0.3)         | 1 (0.3)         | 0 (0)           | 2 (0.2)           |
| 22F/22A                             | 1 (0.3)         | 1 (0.3)         | 0 (0)           | 2 (0.2)           |
| 23B                                 | 0 (0)           | 0 (0)           | 1 (0.3)         | 1 (0.1)           |
| 24F/24A/24B                         | 0 (0)           | 0 (0)           | 2 (1)           | 2 (0.2)           |
| 25F/25A/38                          | 1 (0.3)         | 6 (2)           | 6 (2)           | 13 (1)            |
| 33F/33A/37                          | 0 (0)           | 1 (0.3)         | 0 (0)           | 1 (0.1)           |
| 34                                  | 0 (0)           | 0 (0)           | 1 (0.3)         | 1 (0.1)           |
| 35B                                 | 0 (0)           | 1 (0.3)         | 1 (0.3)         | 2 (0.2)           |
| <b><i>Non-typeable</i></b>          | <b>63 (16)</b>  | <b>43 (13)</b>  | <b>52 (16)</b>  | <b>158 (15)</b>   |
| <b>Total serotyped</b>              | <b>384 (60)</b> | <b>326 (71)</b> | <b>326 (77)</b> | <b>1,036 (68)</b> |
| <b>Missing serotype<sup>a</sup></b> | <b>258 (40)</b> | <b>136 (29)</b> | <b>98 (23)</b>  | <b>492 (32)</b>   |
| <b>Total</b>                        | <b>642</b>      | <b>462</b>      | <b>424</b>      | <b>1,528</b>      |

<sup>a</sup> 272 cases were only positive via latex agglutination and could not be serotyped: 151 from 2011, 83 from 2012, and 38 from 2013. Serotype results were unavailable for 220 culture- and/or rt-PCR-positive cases: 107 from 2011, 53 from 2012, and 60 from 2013.
